held constant if nervousness, apprehension, or weakness increase, or if paroxysmal slow activity appears in the EEG. If convulsions of overt psychosis ensue then a large dose of the barbiturate should be given parenterally. Since the changes in the brain induced by prolonged exposure to barbiturate are diffuse and not focal in nature, diphenylhydantoin (Dilantin) is of no value in stopping the convulsions.

Baker<sup>7</sup> has shown that there are no tissue changes in the nervous systems of dogs on high barbiturate doses for up to four months. Various pathologic lesions, primarily vascular congestion and petechiae, have been described in the human cortex, olivary bodies, thalamus and globus pallidus, but in all cases hypoxia has complicated the picture. Recovery from the barbiturate withdrawal syndrome is usually complete both clinically and by psychometric testing and this was the case with this patient.

#### SUMMARY

A barbiturate abstinence syndrome consisting of hyperpyrexia, tachycardia, tachypnea, hypertension, nausea and vomiting, agitation,

weakness and two grand mal seizures is described in a patient who had received up to 3.6 g. of sodium amobarbital per day over a 25 day period for treatment of severe tetanus.

This work was supported by Research Grant No. HE-01983-09 from the National Heart Institute, U. S. Public Health Service.

#### REFERENCES

1. Van Bergen, F. H., and Buckley, J. J.: The management of severe systemic tetanus, *ANESTHESIOLOGY* 13: 599, 1952.
2. Oswald, J. A.: Management of tetanus, *Postgrad. Med.* 29: 608, 1961.
3. Gillespie, R. D.: On alleged dangers of barbiturates, *Lancet* 2: 337, 1934.
4. Kalinowsky, L. B.: Convulsions in non-epileptic patients on withdrawal of barbiturates, alcohol and other drugs, *Arch. Neurol. Psychiat.* 47: 946, 1942.
5. Isbell, H.: Addiction to barbiturates and the barbiturate abstinence syndrome, *Ann. Intern. Med.* 33: 108, 1950.
6. Fraser, H. F., Shaver, M. R., Maxwell, E. S., and Isbell, H.: Death due to withdrawal of barbiturates, *Ann. Intern. Med.* 38: 1319, 1953.
7. Baker, A. B.: Histological changes in the brains of dogs after long term barbiturate intoxication, *Arch. Path.* 70: 208, 1960.

## CORRESPONDENCE

### Blood/Gas Partition Coefficient of Divinyl Ether

*To the Editor.*—Several current articles concerned with the uptake and distribution of anesthetic agents have made note that the blood/gas partition coefficient of divinyl ether was unknown. I have recently determined this value using the technique of Larson *et al.*<sup>o</sup> Determinations were made in quadruplicate with pooled ACD bank blood (HCT 38-44). Aliquots of divinyl ether (0.2 ml.) were in-

jected into flasks of known volume containing blood. After agitation and equilibration with blood at 37° C. resulting gas concentrations were read on the halothane infrared analyzer. Values were calculated from the gas laws. A blood/gas partition coefficient of  $2.8 \pm 0.2$  was determined.

EDWIN S. MUNSON, M.D.  
Department of Anesthesia  
University of California  
Medical Center  
San Francisco, California

<sup>o</sup> Larson, C. P., Jr., Eger, E. I., II, and Severinghaus, J. W.: Solubility of halothane in blood and tissue homogenates, *ANESTHESIOLOGY* 23: 349, 1962.
